# Supplementary material
Source: MDPI journal article supplement (https://www.mdpi.com/2075-163X/10/10/871)
Supplement: s1 [file s1]

# **Mineralogical study and genetic model of efflorescent salts and crusts from two abandoned tailings in the Taxco mining district, Guerrero (Mexico)**

Teresa Pi-Puig, Jesús Solé and Adriana Gómez Cruz

Minerals MDPI 2020

## **Table S1**

Mineral phases identified and their relative abundance (% weight) calculated with the Rietveld refinement method. JH = Xochula samples. JT = Remedios samples.  
tr = traces (< 1%).

[illegible]

[illegible]

[illegible]

[illegible]

[illegible]
