# Supplementary material
Source: MDPI journal article supplement (https://www.mdpi.com/2075-163X/10/10/871)
Supplement: s1 [file s1]

**Mineralogical study and genetic model of efflorescent salts and crusts from two abandoned tailings in the Taxco mining district, Guerrero (Mexico)**

Teresa Pi-Puig, Jesús Solé and Adriana Gómez Cruz

Minerals MDPI 2020

**Figure S1**

Location of samples in Xochula (JH) and Remedios (JT) tailings. The color of the sampling points is the approximate predominant color of each sample.

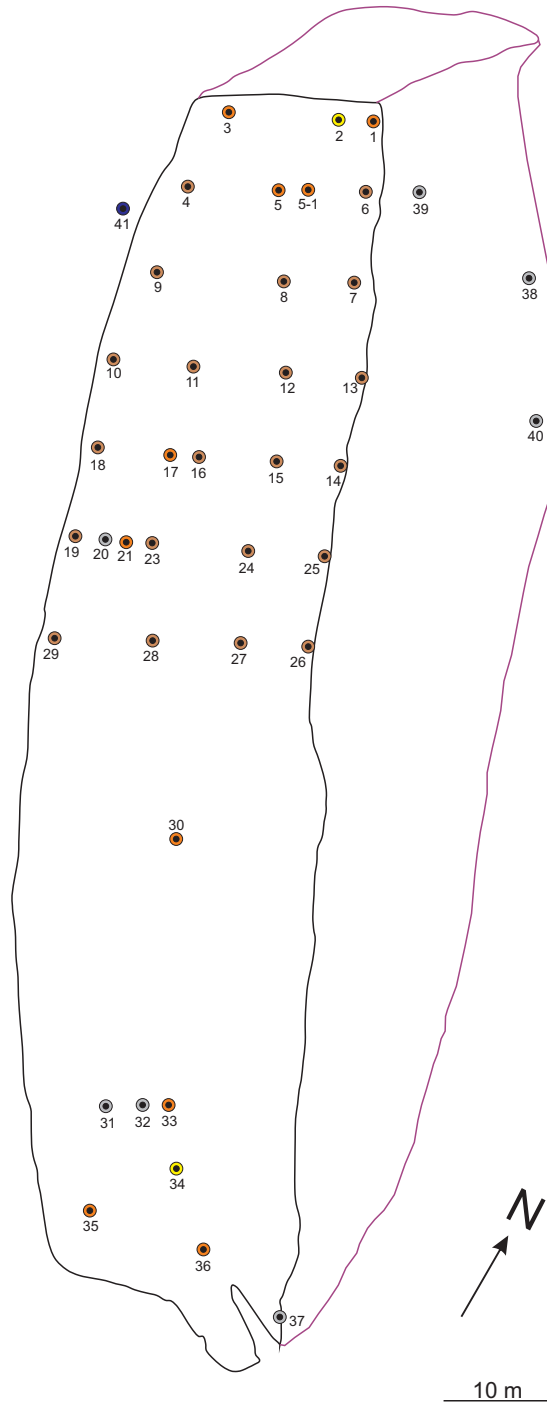

Xochula (JH)

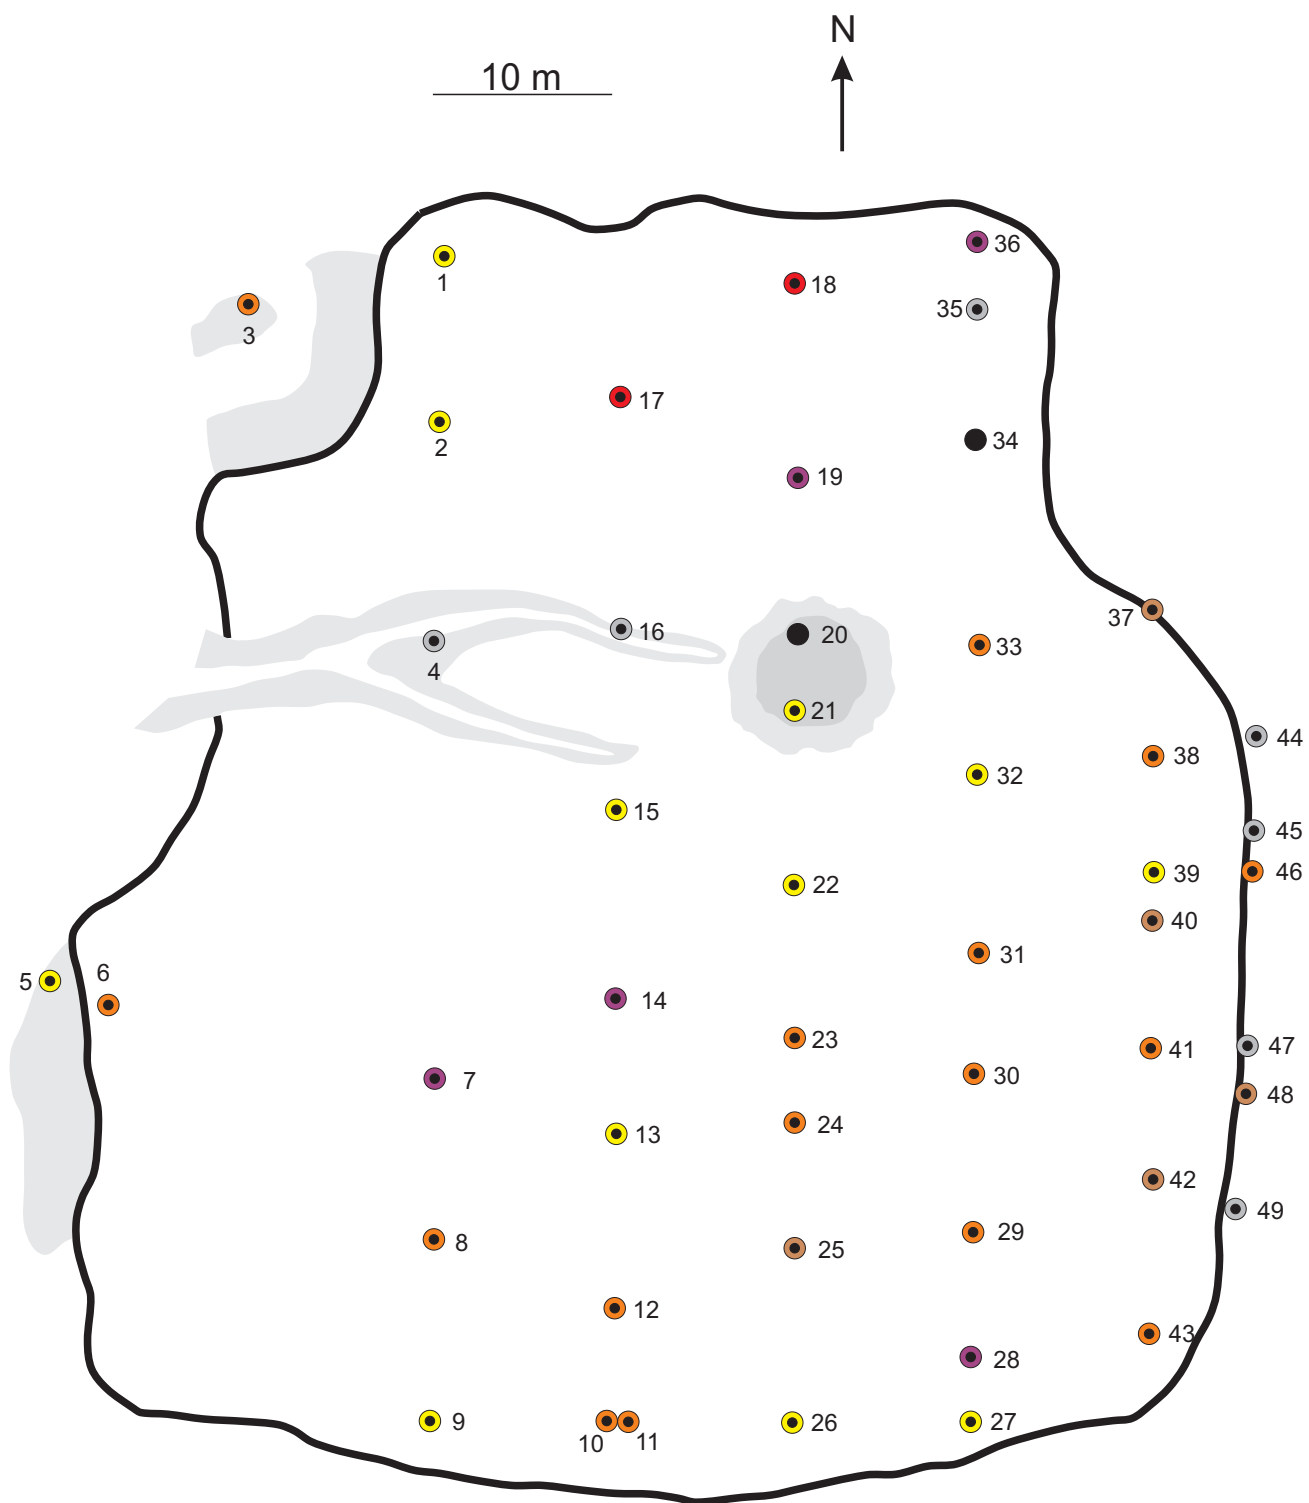

Remedios (JT)
